# Supplementary material for: An efficient method for the synthesis of enol ethers and enecarbamates. Total syntheses of isoindolobenzazepine alkaloids, lennoxamine and chilenine
Source: Royal Society of Chemistry journal article supplement (doi:10.1039/b706087d), 2007-01-01

## Electronic Supplementary Information

### An efficient method for the synthesis of enol ethers and encarbamates. Total syntheses of isoindolobenzazepine alkaloids, lennoxamine and chilenine.

Haruhiko Fuwa\* and Makoto Sasaki\*

Laboratory of Biostructural Chemistry, Graduate School of Life Sciences, Tohoku University, 1-1 Tsutsumidori-amamiya, Aoba-ku, Sendai 981-8555, Japan

Email: hfuwa@bios.tohoku.ac.jp

#### General remarks

All reactions were performed using oven-dried glasswares under an atmosphere of argon. Anhydrous THF was purchased from Kanto Chemicals Inc. and distilled from Na/benzophenone immediately before use. Anhydrous DMF was purchased from Kanto Chemicals Co. Inc. and used as received. CH<sub>3</sub>CN was distilled from CaH<sub>2</sub> under an atmosphere of argon. HMPA was distilled from CaH<sub>2</sub> under reduced pressure. Tetrakis(triphenylphosphine)palladium(0) was prepared according to the literature procedure (D. R. Coulson, *Inorg. Synth.*, 1972, **13**, 121) and stored under argon at -20 °C. All other chemicals were purchased at the highest commercial grade and used as received. Analytical thin-layer chromatography (TLC) was performed using E. Merck silica gel 60 F<sub>254</sub> pre-coated glass plates (0.25 mm-thickness). Flash column chromatography was carried out using Fuji Silysia silica gel BW-300 (200-400 mesh). Melting points were recorded on a Yanaco melting point apparatus MP-S3 and are uncorrected. <sup>1</sup>H and <sup>13</sup>C NMR spectra were recorded on a Varian Unity INOVA-500 spectrometer. Chemical shift values are reported in δ (ppm) downfield from tetramethylsilane with reference to internal residual solvent [<sup>1</sup>H NMR CHCl<sub>3</sub> (7.24); C<sub>6</sub>H<sub>6</sub>D<sub>6</sub> (7.15); <sup>13</sup>C NMR CDCl<sub>3</sub> (77.0); C<sub>6</sub>D<sub>6</sub> (128.0)]. EI and FAB mass spectra were measured on a JEOL JMS-700 spectrometer and ESI-TOF mass spectra were recorded on a Bruker microTOFfocus spectrometer.

#### Spectroscopic data for newly synthesised compounds and compounds **25** and **34**.

Compounds **8a,b** (an inseparable mixture, data for (*Z*)-isomer **8a**): <sup>1</sup>H NMR (500 MHz, C<sub>6</sub>D<sub>6</sub>) δ 7.21 (d, *J* = 7.5 Hz, 2H), 6.81 (d, *J* = 7.5 Hz, 2H), 5.82 (apparent d, *J* = 4.0 Hz, 1H), 4.39 (apparent t, *J* = 7.0 Hz, 1H), 4.29 (s, 2H), 3.45 (m, 2H), 3.30 (s, 3H), 3.26 (m, 2H), 1.74 (d, *J* = 7.0 Hz, 3H), 1.59 (m, 4H); <sup>13</sup>C NMR (125 MHz, C<sub>6</sub>D<sub>6</sub>) δ 159.6, 146.1, 131.4, 129.3 (× 2), 114.0 (× 2), 100.5, 72.6, 71.8, 69.7, 54.7, 27.1, 26.6, 9.6; HRMS (EI) calcd for C<sub>15</sub>H<sub>22</sub>O<sub>3</sub> (M<sup>+</sup>) 250.1569, found 250.1574.

Compound **11a**: <sup>1</sup>H NMR (500 MHz, C<sub>6</sub>D<sub>6</sub>) δ 7.84 (d, *J* = 7.5 Hz, 2H), 7.27 (t, *J* = 7.5 Hz, 2H), 7.05 (t, *J* = 7.5 Hz, 1H), 6.02 (d, *J* = 7.5 Hz, 1H), 5.26 (d, *J* = 7.5 Hz, 1H), 3.24 (dt, *J* = 11.0, 4.5 Hz, 1H), 2.26 (m, 1H), 1.86 (m, 1H), 1.47—1.44 (m, 2H), 1.35 (m, 1H), 1.08 (m, 1H), 0.98 (ddd, *J* = 12.0, 12.0, 11.5 Hz, 1H), 0.85 (d, *J* = 7.0 Hz, 3H), 0.80 (d, *J* = 6.0 Hz, 3H), 0.76 (d, *J* = 6.5 Hz, 3H), 0.66 (m, 1H); <sup>13</sup>C NMR (125 MHz, C<sub>6</sub>D<sub>6</sub>) δ 146.4, 137.1, 128.6, 128.5, 128.5, 125.8, 105.7, 83.8, 48.0, 42.1, 34.4, 31.6, 26.3, 23.7, 22.2, 20.9, 16.6 (one carbon signal is missing due to solvent overlapping); HRMS (EI) calcd for C<sub>18</sub>H<sub>26</sub>O (M<sup>+</sup>) 258.1984, found 258.1985.

Compound **11b**:  $^1\text{H}$  NMR (500 MHz,  $\text{C}_6\text{D}_6$ )  $\delta$  7.18—7.12 (m, 4H), 7.02 (m, 1H), 6.86 (d,  $J = 13.0$  Hz, 1H), 6.16 (d,  $J = 13.0$  Hz, 1H), 3.39 (dt,  $J = 10.5, 4.0$  Hz, 1H), 2.30 (m, 1H), 1.97 (m, 1H), 1.49—1.46 (m, 2H), 1.37 (m, 1H), 1.13 (m, 1H), 1.00 (ddd,  $J = 12.0, 11.5, 11.5$  Hz, 1H), 0.90 (d,  $J = 7.0$  Hz, 3H), 0.82 (d,  $J = 6.5$  Hz, 3H), 0.81 (d,  $J = 7.0$  Hz, 3H), 0.68 (m, 1H);  $^{13}\text{C}$  NMR (125 MHz,  $\text{C}_6\text{D}_6$ )  $\delta$  147.9, 137.3, 128.8, 125.7, 125.4, 118.1, 107.7, 81.4, 48.1, 41.6, 34.5, 31.6, 26.2, 23.8, 22.2, 20.9, 16.7 (one carbon signal is missing due to solvent overlapping); HRMS (EI) calcd for  $\text{C}_{18}\text{H}_{26}\text{O}$  ( $\text{M}^+$ ) 258.1984, found 258.1987.

Compound **14**:  $^1\text{H}$  NMR (500 MHz,  $\text{C}_6\text{D}_6$ )  $\delta$  7.64 (d,  $J = 6.5$  Hz, 2H), 6.08 (dd,  $J = 14.0, 6.0$  Hz, 1H), 5.93 (m, 1H), 5.33 (s, 1H), 5.12-5.06 (m, 2H), 4.40 (dd,  $J = 14.0, 2.0$  Hz, 1H), 4.18 (dd,  $J = 10.0, 4.0$  Hz, 1H), 3.99 (dd,  $J = 6.5, 1.5$  Hz, 1H), 3.46—3.39 (m, 2H), 3.24 (ddd,  $J = 12.0, 7.0, 3.0$  Hz, 1H), 3.14—3.04 (m, 2H), 2.55 (m, 1H), 2.43 (ddd,  $J = 8.0, 4.0, 4.0$  Hz, 1H), 2.23 (m, 1H), 1.62 (ddd,  $J = 11.5, 11.0, 10.0$  Hz, 1H);  $^{13}\text{C}$  NMR (125 MHz,  $\text{C}_6\text{D}_6$ )  $\delta$  150.5, 138.5, 134.5, 129.0, 128.5 ( $\times 2$ ), 126.7 ( $\times 2$ ), 117.5, 101.6, 89.2, 79.9, 76.4, 75.8, 73.4, 69.4, 36.2, 35.1; HRMS (FAB) calcd for  $\text{C}_{18}\text{H}_{23}\text{O}_4$  [ $(\text{M} + \text{H})^+$ ] 303.1596, found 303.1597.

Compound **20**:  $^1\text{H}$  NMR (500 MHz,  $\text{C}_6\text{D}_6$ )  $\delta$  7.15—6.72 (m, 6H), 4.74 (m, 1H), 3.69—3.62 (m, 2H), 2.08—2.01 (m, 2H), 1.62—1.55 (m, 2H), 1.55—1.40 (m, 4H); HRMS (FAB) calcd for  $\text{C}_{14}\text{H}_{18}\text{NO}_2$  [ $(\text{M} + \text{H})^+$ ] 232.1337, found 232.1344.

Compound **23**:  $^1\text{H}$  NMR (500 MHz,  $\text{C}_6\text{D}_6$ )  $\delta$  7.59 (dd,  $J = 15.5, 8.5$  Hz, 1H), 7.15 (d,  $J = 8.0$  Hz, 2H), 6.64 (d,  $J = 8.0$  Hz, 2H), 4.13 (d,  $J = 8.5$  Hz, 1H), 3.83 (d,  $J = 15.5$  Hz, 1H), 1.26 (s, 9H);  $^{13}\text{C}$  NMR (125 MHz,  $\text{C}_6\text{D}_6$ )  $\delta$  152.0, 137.8, 135.1, 132.6 ( $\times 2$ ), 130.9 ( $\times 2$ ), 121.4, 93.5, 81.2, 28.0 ( $\times 3$ ); HRMS (FAB) calcd for  $\text{C}_{13}\text{H}_{18}^{79}\text{BrNO}_2\text{Na}$  [ $(\text{M} + \text{Na})^+$ ] 322.0419, found 322.0419.

Compound **30**: mp 66—67 °C (EtOAc/hexane);  $^1\text{H}$  NMR (500 MHz,  $\text{CDCl}_3$ )  $\delta$  6.77 (d,  $J = 8.0$  Hz, 1H), 6.72 (s, 1H), 6.68 (d,  $J = 8.0$  Hz, 1H), 5.94 (s, 2H), 5.61 (br, 1H), 4.30 (t,  $J = 5.0$  Hz, 1H), 3.46 (s, 2H), 3.35—3.33 (m, 8H);  $^{13}\text{C}$  NMR (125 MHz,  $\text{CDCl}_3$ )  $\delta$  171.2, 148.0, 146.9, 128.3, 122.5, 109.7, 108.6, 102.6, 101.1, 54.5, 43.3, 41.1; HRMS (FAB) calcd for  $\text{C}_{13}\text{H}_{18}\text{NO}_5$  [ $(\text{M} + \text{H})^+$ ] 268.1185, found 268.1191.

Compound **31**: mp 200—201 °C ( $\text{CHCl}_3$ );  $^1\text{H}$  NMR (500 MHz,  $\text{CDCl}_3$ )  $\delta$  7.16 (br, 1H), 6.73 (s, 1H), 6.67 (s, 1H), 6.24 (d,  $J = 9.5$  Hz, 1H), 6.16 (dd,  $J = 9.5, 4.5$  Hz, 1H), 5.95 (s, 2H), 3.39 (s, 2H); HRMS (EI) calcd for  $\text{C}_{11}\text{H}_9\text{NO}_3$  ( $\text{M}^+$ ) 203.0574, found 203.0585.

Compound **32**: mp 222—224 °C (MeOH);  $^1\text{H}$  NMR (500 MHz,  $\text{CDCl}_3$ )  $\delta$  6.61 (s, 1H), 6.59 (s, 1H), 6.10 (br, 1H), 5.90 (s, 2H), 3.72 (s, 2H), 3.52 (q,  $J = 6.0$  Hz, 2H), 3.02 (t,  $J = 6.0$  Hz, 2H); HRMS (EI) calcd for  $\text{C}_{11}\text{H}_{11}\text{NO}_3$  ( $\text{M}^+$ ) 205.0749, found 205.0736.

Compound **33**:  $^1\text{H}$  NMR (500 MHz,  $\text{CDCl}_3$ )  $\delta$  7.13 (d,  $J = 9.0$  Hz, 1H), 6.74 (d,  $J = 9.0$  Hz, 1H), 6.58 (s, 1H), 6.49 (s, 1H), 5.90 (s, 2H), 4.45 (brm, 2H), 3.93—3.83 (m, 2H), 3.79 (s, 3H), 3.64 (s, 3H), 3.23 (brm, 2H);  $^{13}\text{C}$  NMR (125 MHz,  $\text{CDCl}_3$ )  $\delta$  171.8, 166.6, 151.7, 147.3, 146.1, 145.3, 135.0, 128.6, 127.4,

122.1, 113.5, 110.9, 109.9, 107.7, 101.1, 61.0, 55.9, 44.7, 40.6, 32.7; HRMS (EI) calcd for  $C_{20}H_{18}^{79}BrNO_6 (M^+)$  447.0318, found 447.0318.

Compound **27** (exists as an approximately 7:3 mixture of rotational isomers):  $^1H$  NMR (500 MHz,  $CDCl_3$ , 293 K)  $\delta$  7.41 (d,  $J = 11.0$  Hz, 0.3H), 7.26 (d,  $J = 7.0$  Hz, 0.7H), 6.84 (d,  $J = 7.0$  Hz, 0.7H), 6.83 (m, 0.3H), 6.68 (s, 0.3H), 6.61 (s, 0.7H), 6.59 (s, 0.7H), 6.48 (s, 0.3H), 6.18 (d,  $J = 10.0$  Hz, 0.7H), 5.90 (s, 2H), 5.78 (d,  $J = 11.0$  Hz, 0.3H), 5.39 (s, 0.7H), 4.30 (dd,  $J = 13.0, 7.0$  Hz, 0.7H), 4.04 (dd,  $J = 13.0, 7.0$  Hz, 0.7H), 3.86 (s, 3H), 3.83 (s, 3H), 3.59 (t,  $J = 4.5$  Hz,  $0.3H \times 2$ ), 3.05-2.96 (m, 2H);  $^{13}C$  NMR (125 MHz,  $CDCl_3$ , 293 K)  $\delta$  164.8, 152.3, 146.3, 146.2, 146.1, 133.8, 133.5, 132.2, 128.2, 128.1, 128.1, 128.0, 124.9, 122.6, 114.3, 114.0, 112.3, 110.1, 110.3, 110.2, 109.4, 109.2, 101.0, 61.7, 61.6, 56.0, 56.0, 48.1, 42.8, 36.8, 36.2; HRMS (ESI)  $C_{20}H_{18}^{79}BrNO_5Na [(M + Na)^+]$  454.0267, found 454.0266.

Compound **25** (lennoxamine): mp 229—230 °C (MeOH) (lit.,<sup>1</sup> 229—230 °C);  $^1H$  NMR (500 MHz,  $CDCl_3$ )  $\delta$  7.15 (d,  $J = 8.5$  Hz, 1H), 7.11 (d,  $J = 8.5$  Hz, 1H), 6.75 (s, 1H), 6.68 (s, 1H), 5.93 (d,  $J = 5.0$  Hz, 1H), 5.93 (d,  $J = 5.0$  Hz, 1H), 4.72 (m, 1H), 4.28 (apparent d,  $J = 10.0$  Hz, 1H), 4.08 (s, 3H), 3.89 (s, 3H), 3.09 (dd,  $J = 14.5, 1.5$  Hz, 1H), 2.92—2.85 (m, 2H), 2.83—2.76 (m, 2H);  $^{13}C$  NMR (125 MHz,  $CDCl_3$ )  $\delta$  165.2, 152.6, 147.2, 146.3, 146.1, 138.2, 134.8, 130.9, 124.2, 117.1, 116.1, 110.3 ( $\times 2$ ), 101.0, 62.5, 60.1, 56.7, 42.7, 41.1, 35.9; HRMS (ESI) calcd for  $C_{20}H_{19}NO_5Na [(M + Na)^+]$  376.1161, found 376.1166.

Compound **34** (dehydrolennoxamine): mp 212—214 °C (lit.,<sup>1</sup> 209—211 °C);  $^1H$  NMR (500 MHz,  $CDCl_3$ )  $\delta$  7.40 (d,  $J = 8.0$  Hz, 1H), 7.11 (d,  $J = 8.0$  Hz, 1H), 6.78 (s, 1H), 6.64 (s, 1H), 6.30 (s, 1H), 5.94 (s, 2H), 4.08 (s, 3H), 3.90 (s, 3H), 4.20—3.80 (m, 2H), 3.01 (m, 2H);  $^{13}C$  NMR (125 MHz,  $CDCl_3$ )  $\delta$  163.7, 152.9, 146.91, 146.85, 146.6, 133.9, 133.3, 131.1, 127.8, 120.3, 116.3, 114.3, 110.3, 110.2, 104.9, 101.2, 62.5, 56.7, 41.8, 35.5; HRMS (ESI) calcd for  $C_{20}H_{17}NO_5Na [(M + Na)^+]$  374.1004, found 374.1004.

### Reference

1. H. Ishibashi, H. Kawanami and M. Ikeda, *J. Chem. Soc., Perkin Trans 1*, 1997, 817.

HF21131a/CDC13

Pulse Sequence: s2pul

Solvent: CDC13

Temp. 20.0 C / 293.1 K

INOVA-500 "varian"

Relax. delay 1.000 sec

Pulse 45.0 degrees

Acq. time 1.892 sec

Width 8000.0 Hz

8 repetitions

OBSERVE F1, 499.8593228 MHz

DATA PROCESSING

Ft size 32768

Total time 0 min, 23 sec

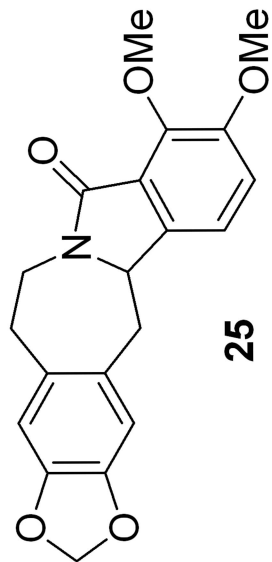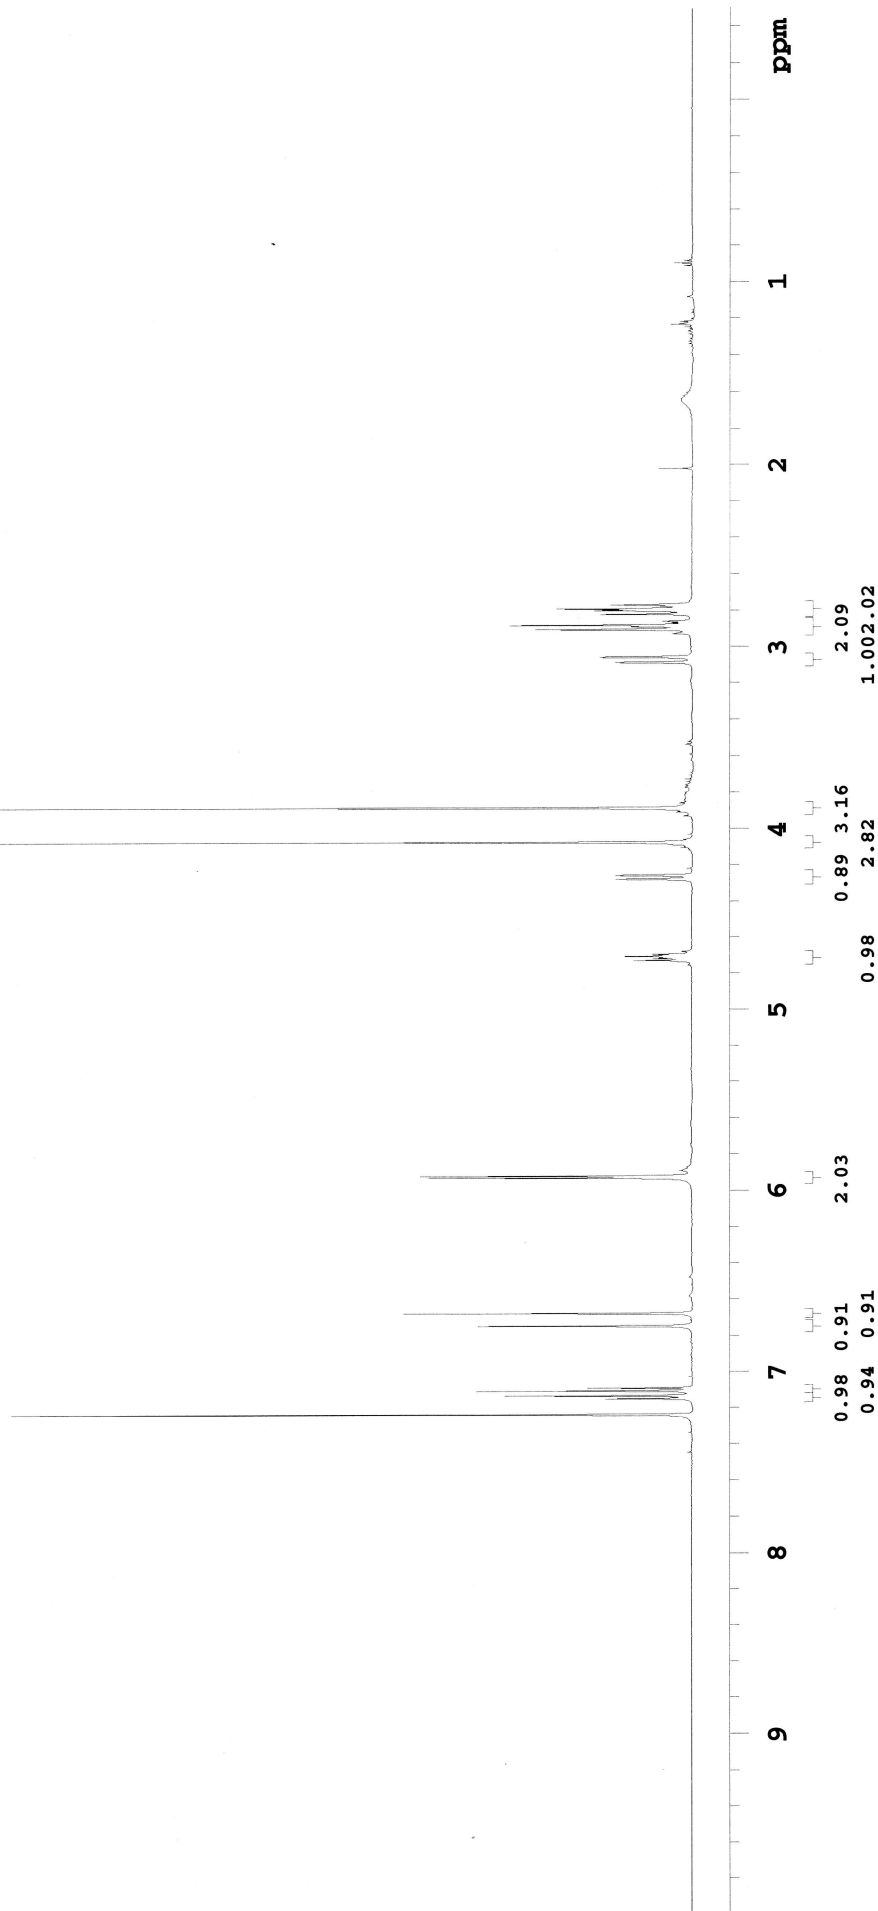

STANDARD CARBON PARAMETERS

Pulse Sequence: s2pul

Solvent: CDC13

Temp. 20.0 C / 293.1 K

User: 1-14-87

INOVA-500 "varian"

Relax. delay 0.700 sec

Pulse 45.0 degrees

Acq. time 1.298 sec

Width 37735.8 Hz

512 repetitions

OBSERVE C13, 125.6897266 MHz

DECOUPLE H1, 499.8618041 MHz

Power 27 dB

continuously on

WALTZ-16 modulated

DATA PROCESSING

Line broadening 0.5 Hz

FT size 131072

Total time 2 hr, 51 min, 19 sec

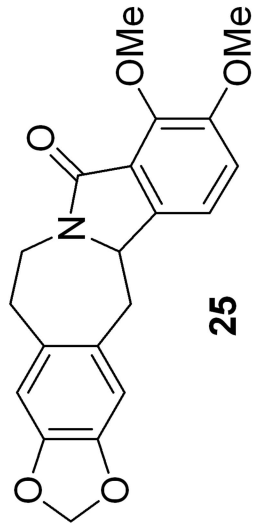

25

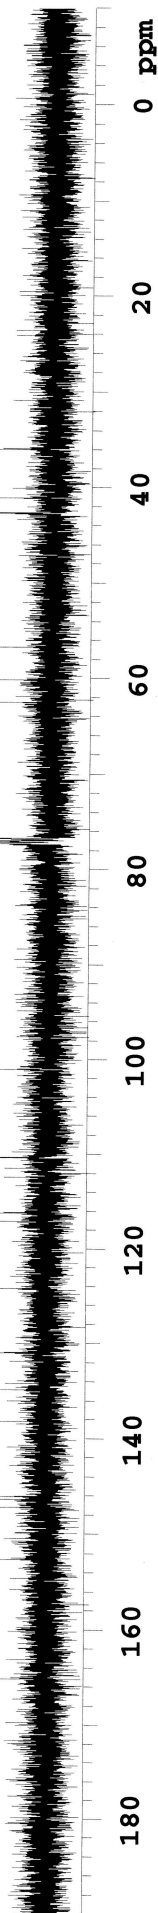

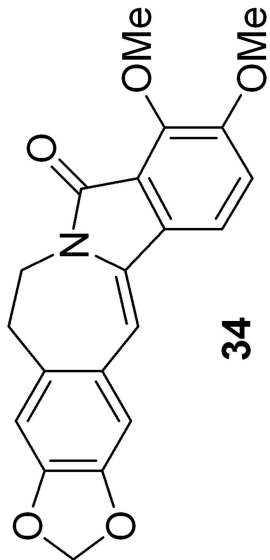

HF21138/CDCl3

Pulse Sequence: s2pul

Solvent: CDCl3

Temp. 20.0 C / 293.1 K

INOVA-500 "varian"

Relax. delay 1.000 sec

Pulse 45.0 degrees

Acq. time 1.892 sec

Width 8000.0 Hz

8 repetitions

OBSERVE H1, 499.8593228 MHz

DATA PROCESSING

Ft size 32768

Total time 0 min, 23 sec

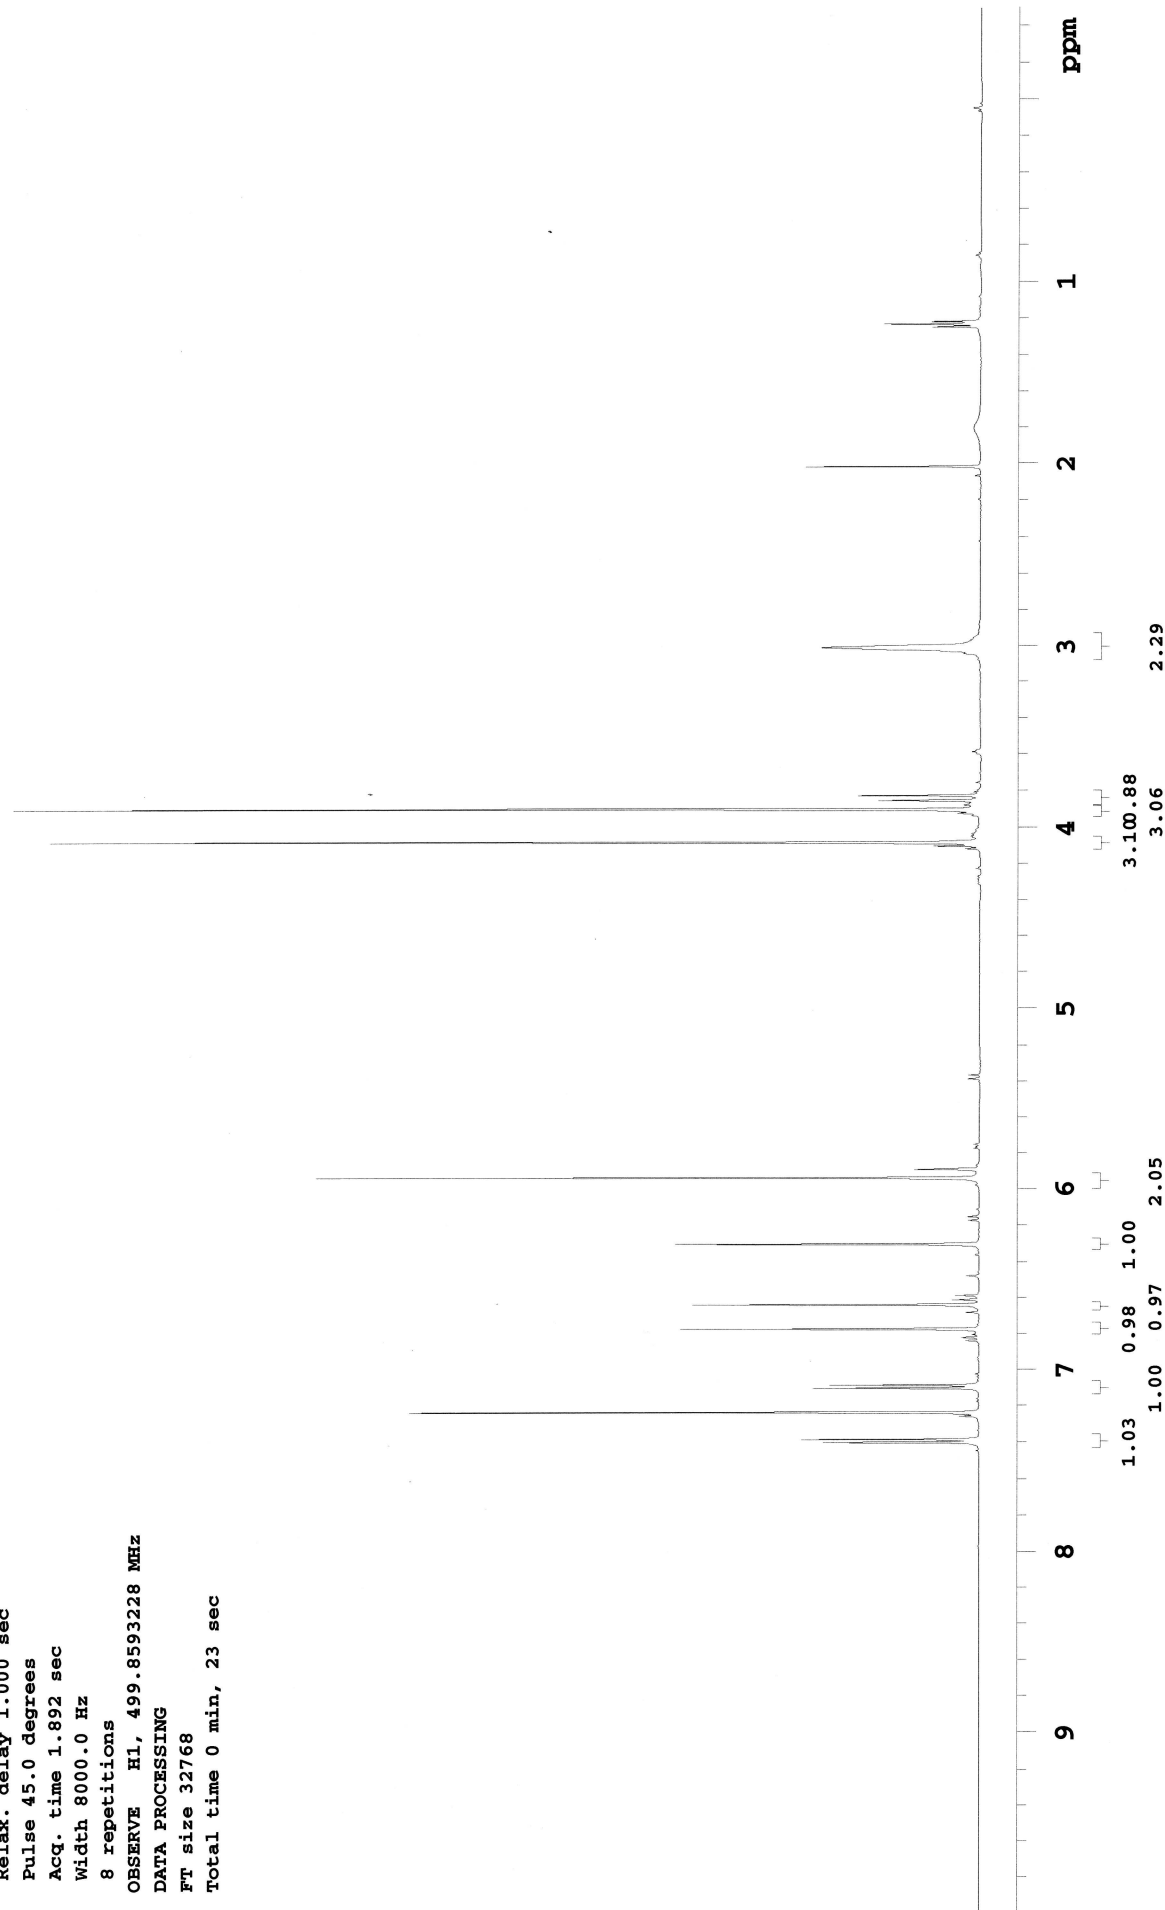

STANDARD CARBON PARAMETERS

Pulse Sequence: s2pul

Solvent: CDC13

Temp. 20.0 C / 293.1 K

User: 1-14-87

INOVA-500 "varian"

Relax. delay 0.700 sec

Pulse 45.0 degrees

Acq. time 1.298 sec

Width 37735.8 Hz

224 repetitions

OBSERVE C13, 125.6897277 MHz

DECOUPLE H1, 499.8618041 MHz

Power 27 dB

continuously on

WALTZ-16 modulated

DATA PROCESSING

Line broadening 0.5 Hz

FT size 131072

Total time 2 hr, 51 min, 19 sec

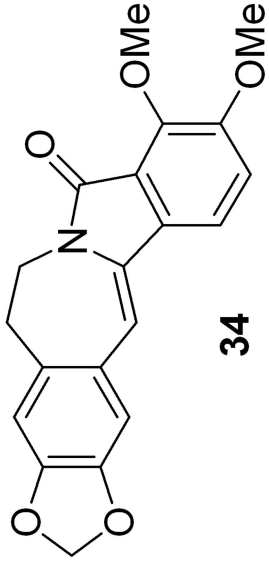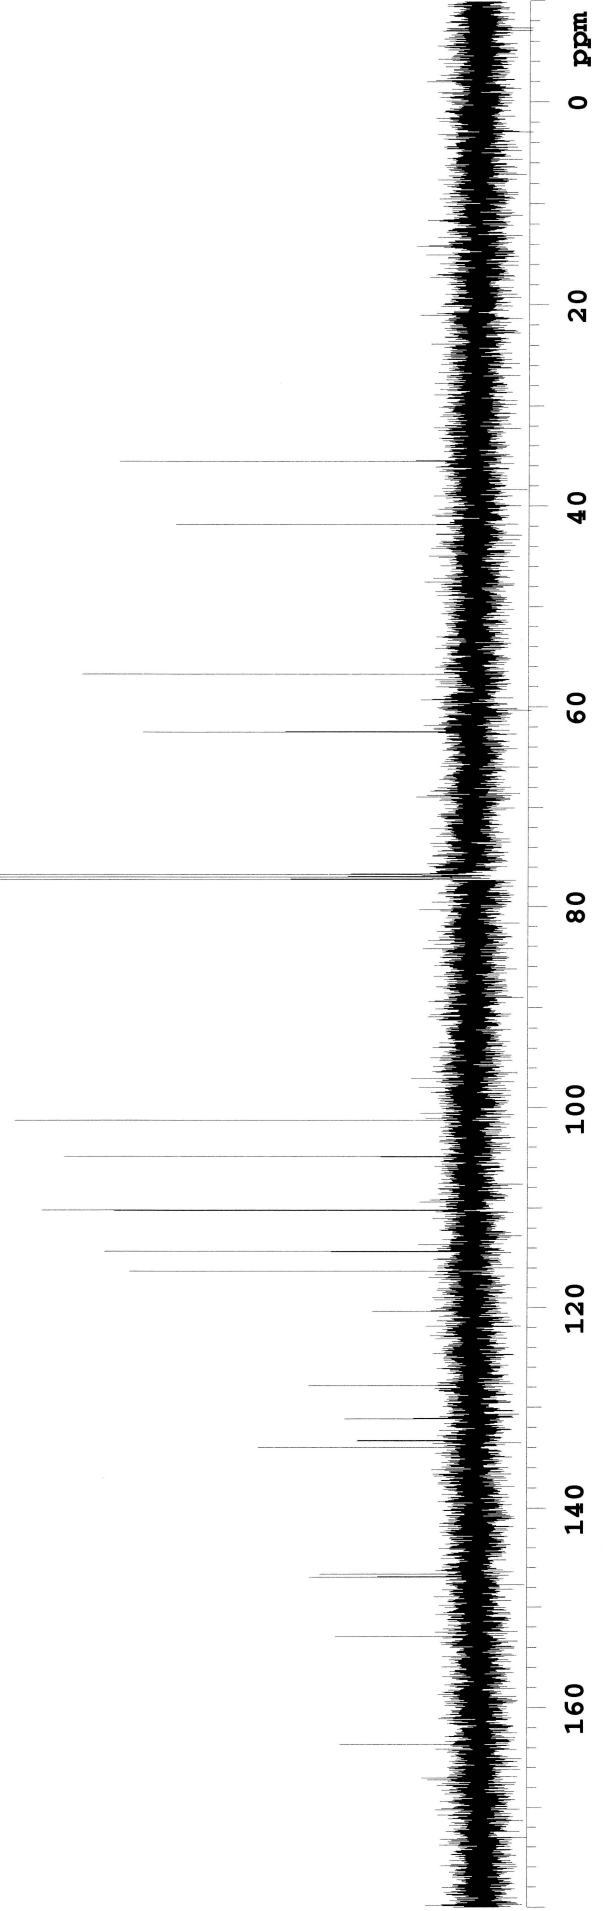

Supplement: b706087d.pdf [file b706087d.pdf]
